# Supplementary material
Source: PubMed Central journal article supplement (PMC8128078)

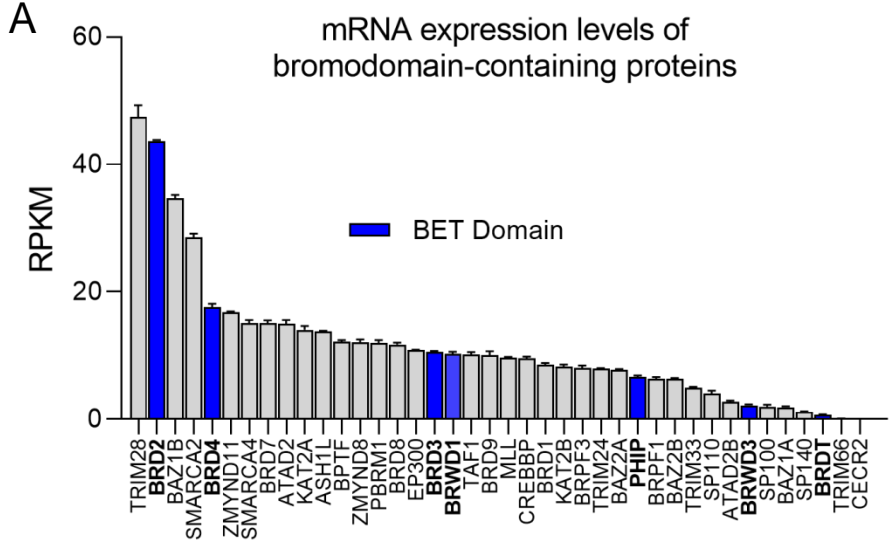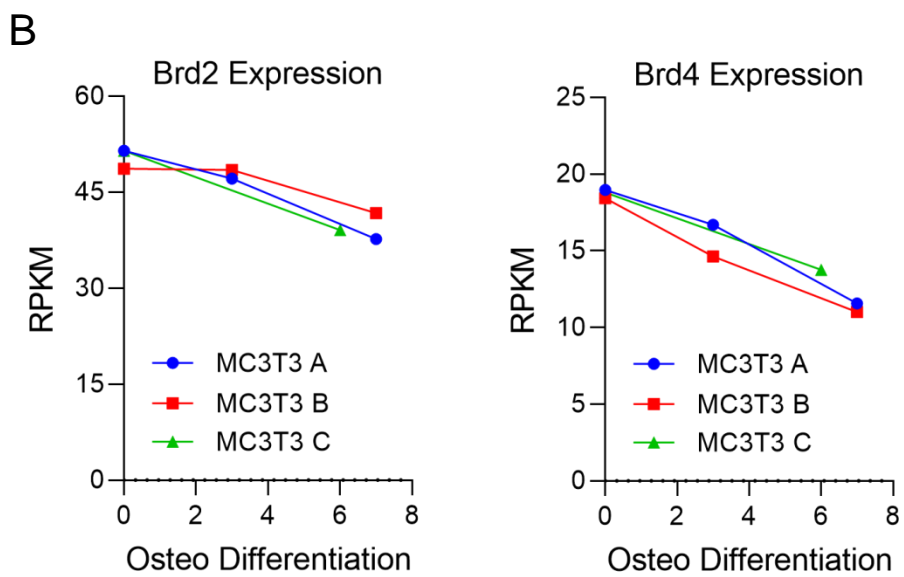

Figure 1

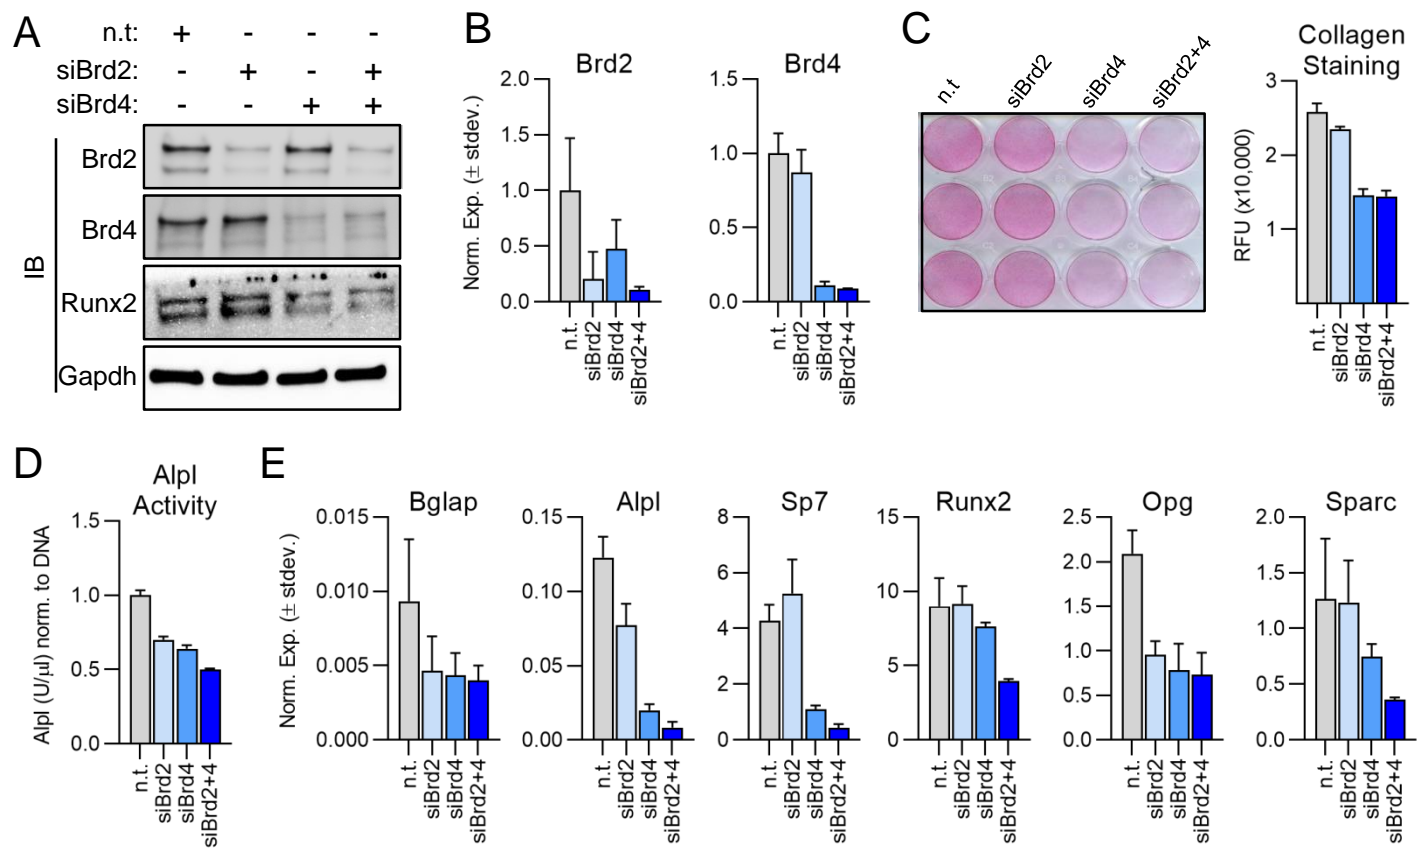

Figure 2

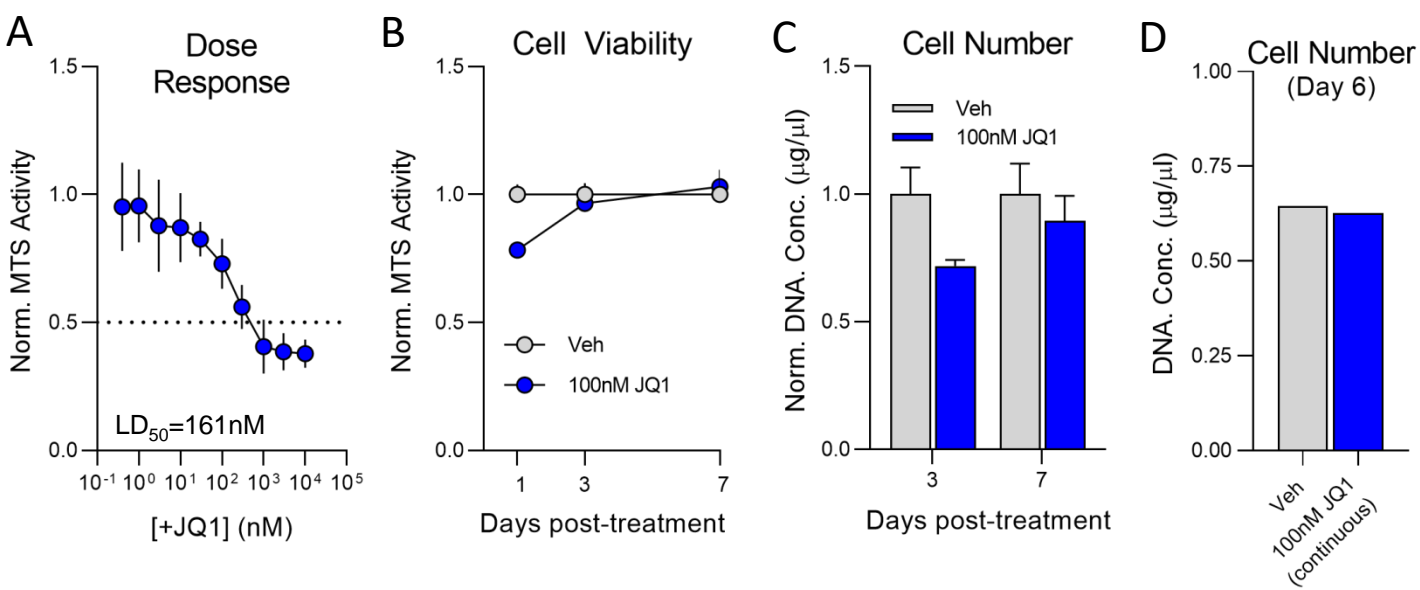

Figure 3

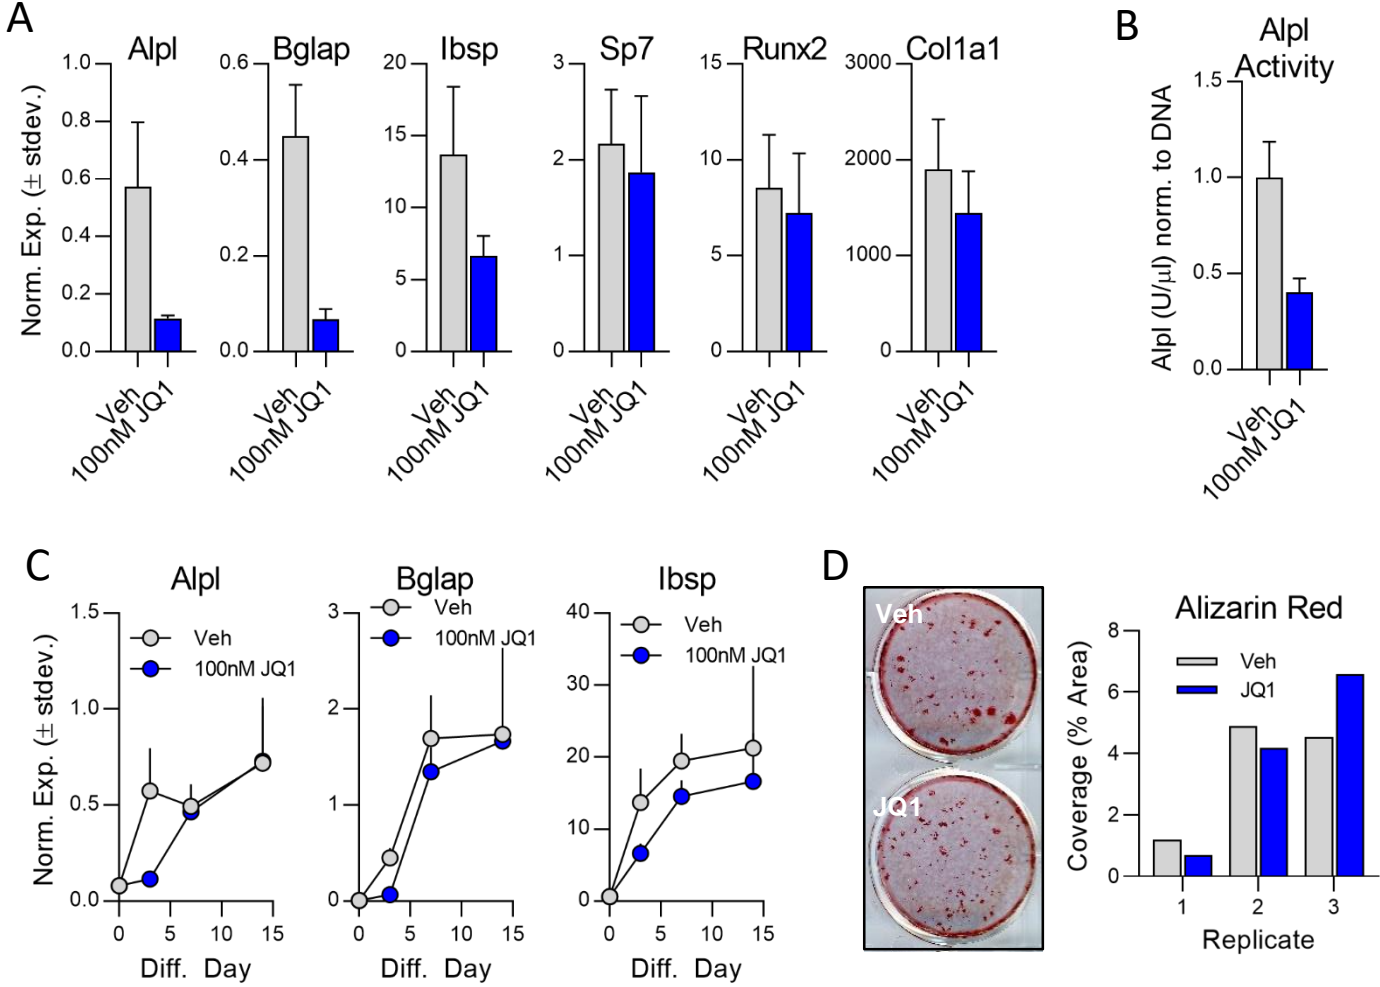

Figure 4

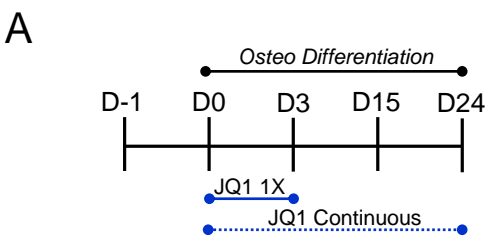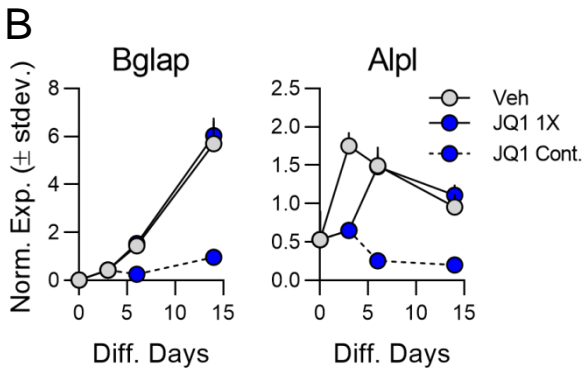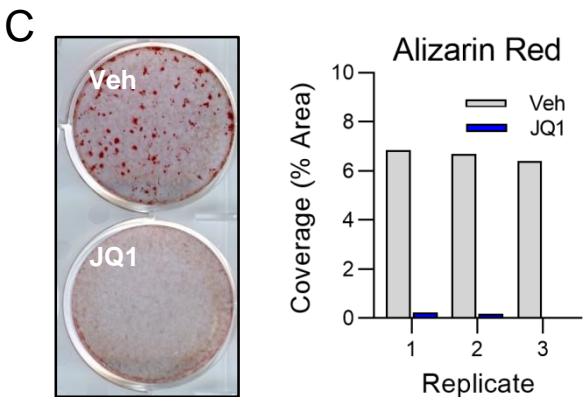

Figure 5

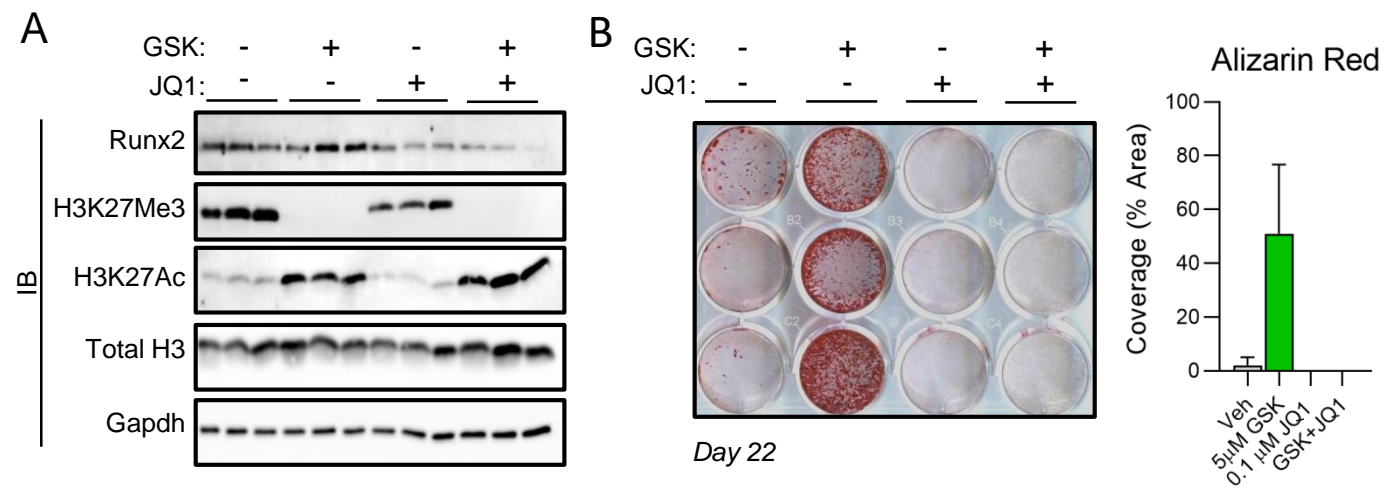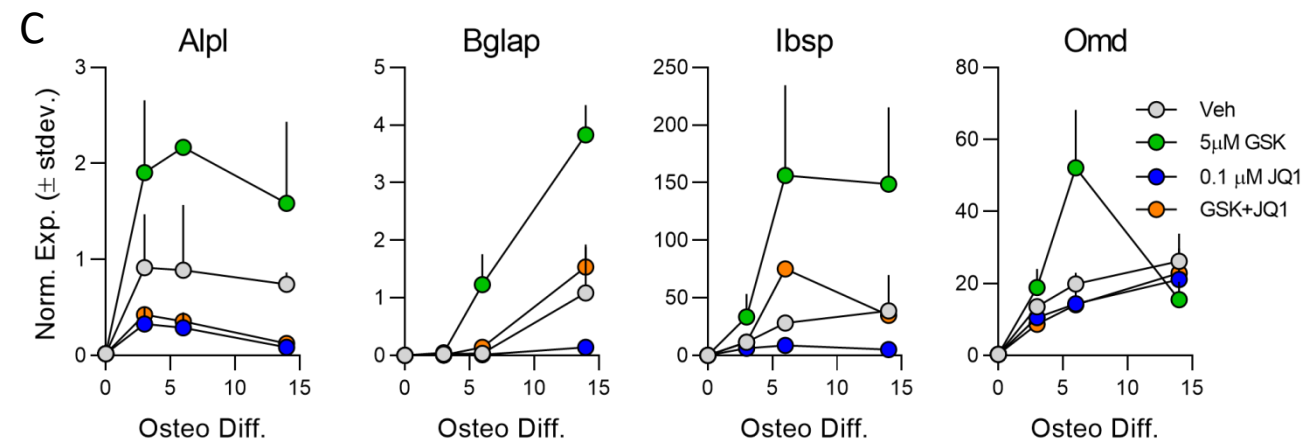

Figure 6

**A**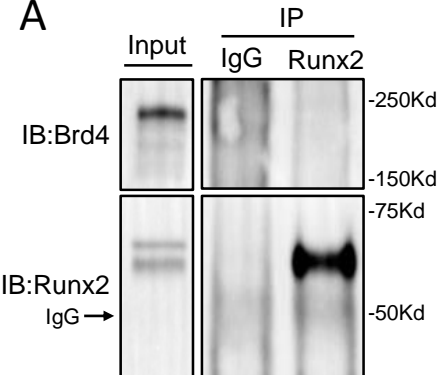**B**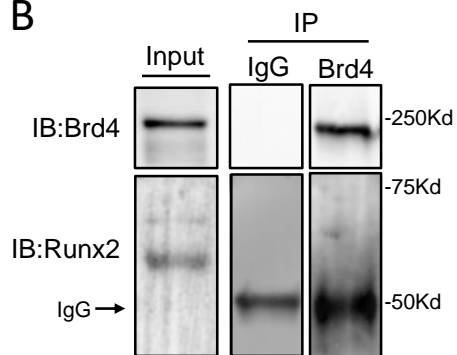**C**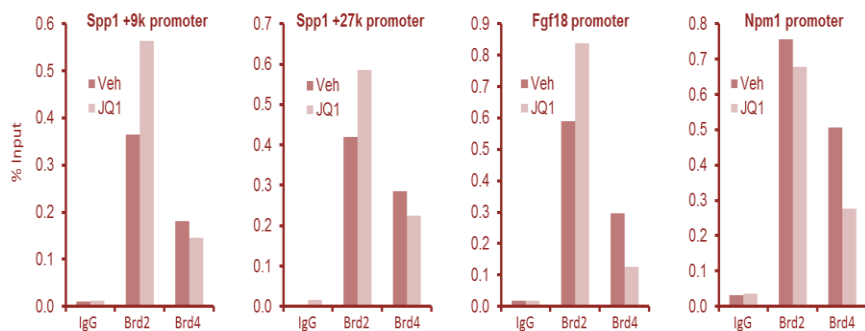

Figure 7

END



# ChIP-qPCR

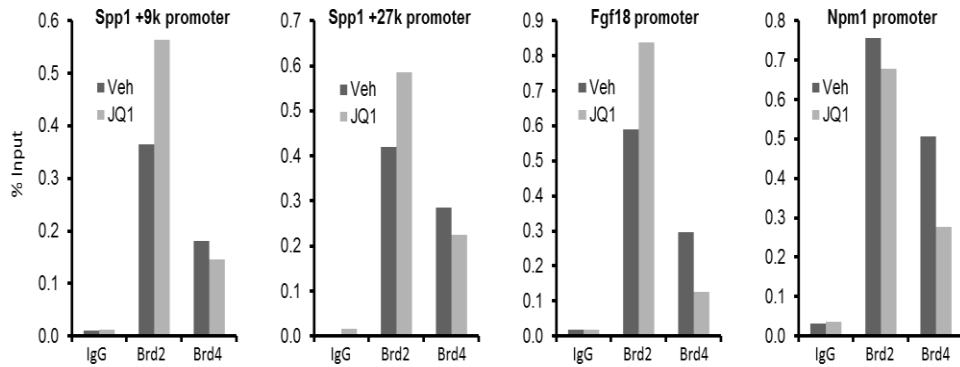

Figure 8

IP:Brd4  
IB:Brd4

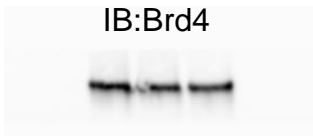

IP:IgG  
IB:Brd4

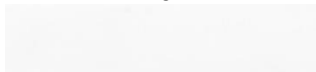

IP:IgG  
IB:Runx2

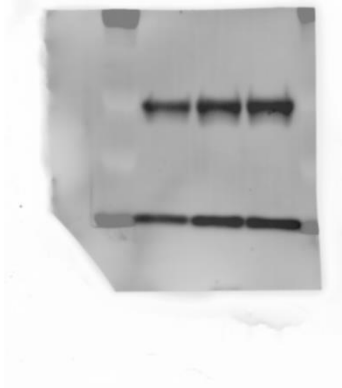

IP:Brd4  
IB:Runx2

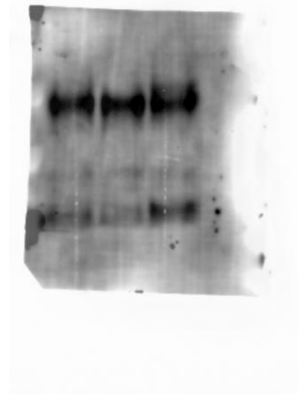

Input  
IB:Runx2

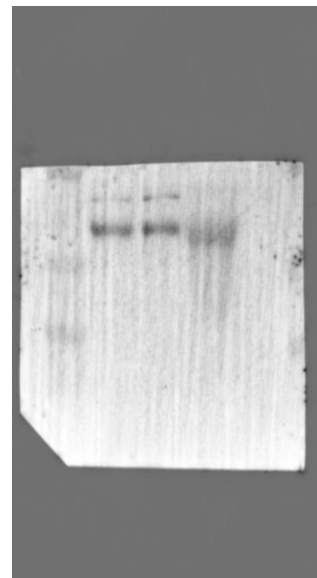

Input  
IB:Brd4

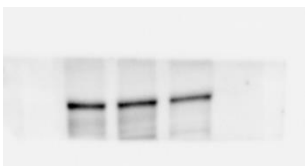

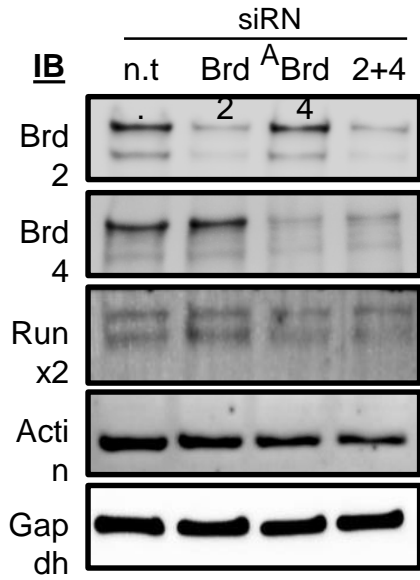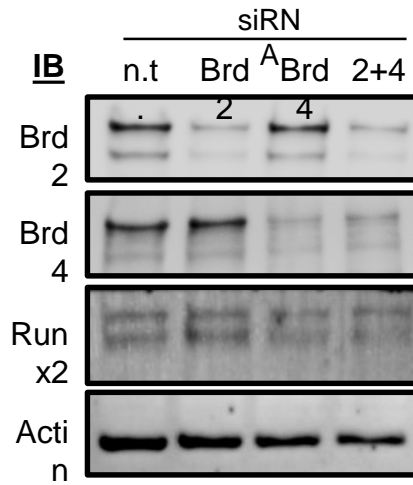

Figure 1 blots

Runx2

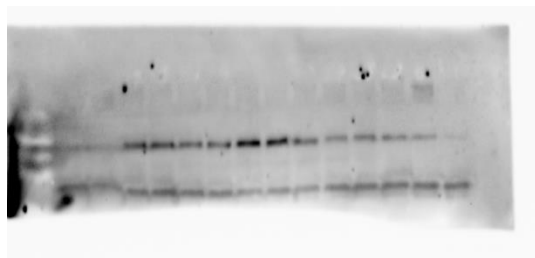

H3K27Ac

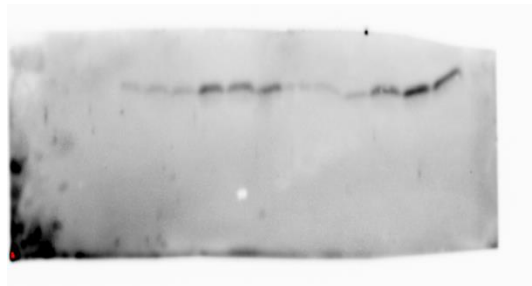

Gapdh

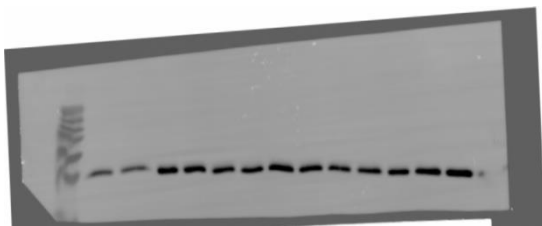

H3K27Ac

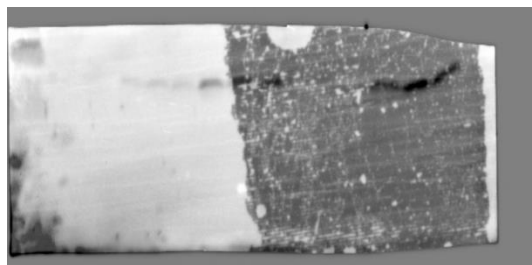

Total H3

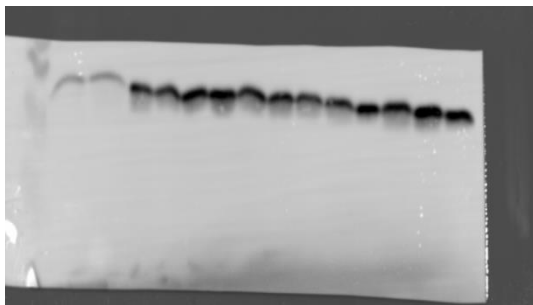

H3K27Me

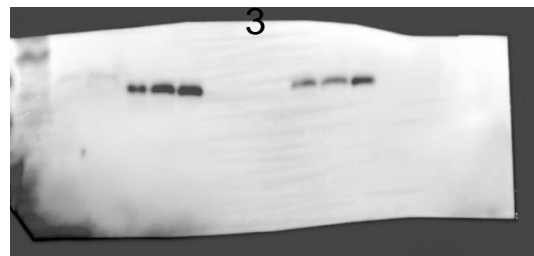

Figure 5  
blots

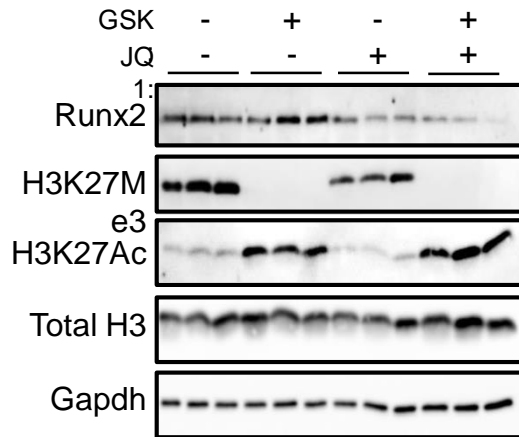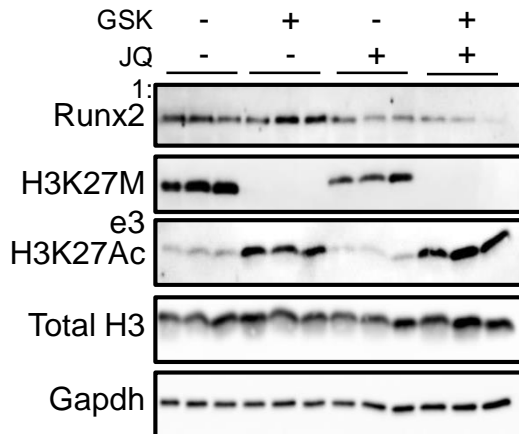

# Supplemental Data

Brd4

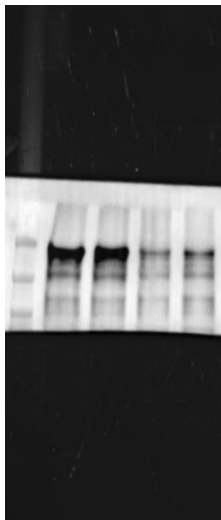

Brd2

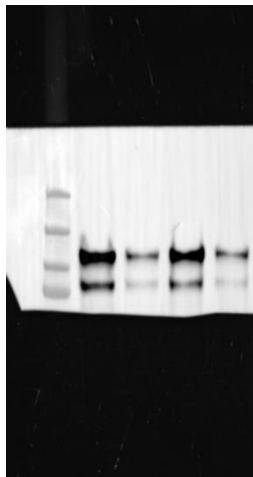

Runx2

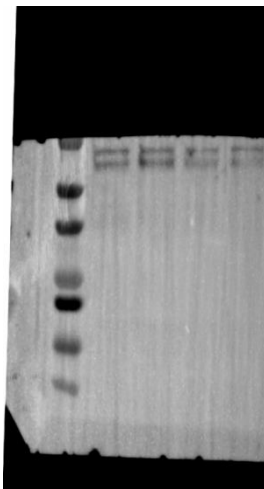

Actin

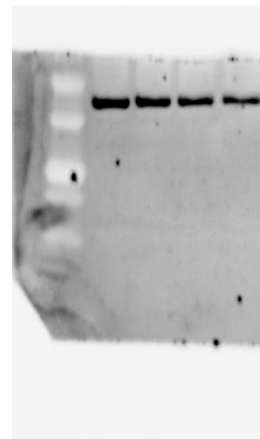

Gapdh

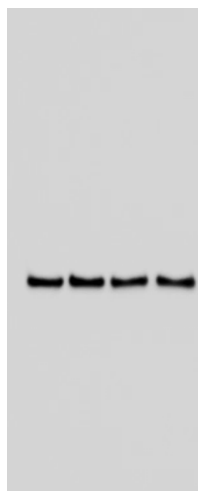

Total  
H3

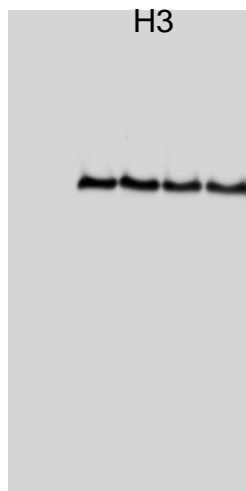

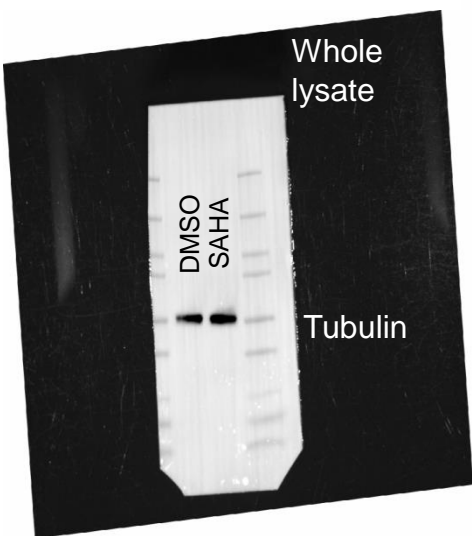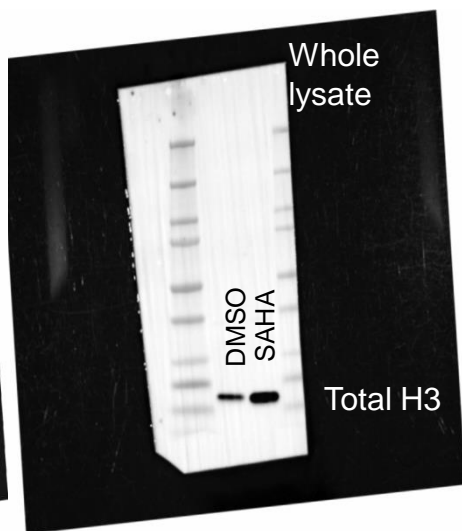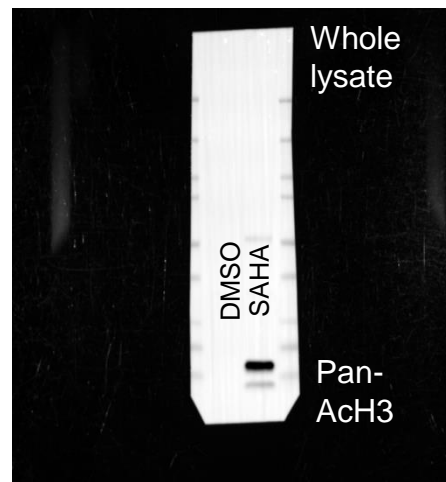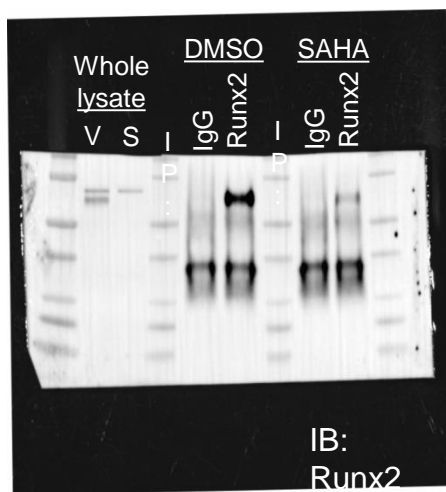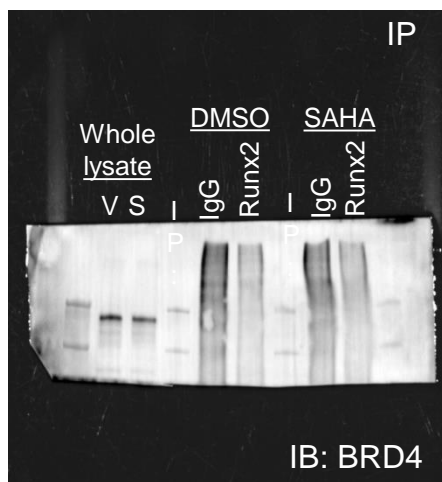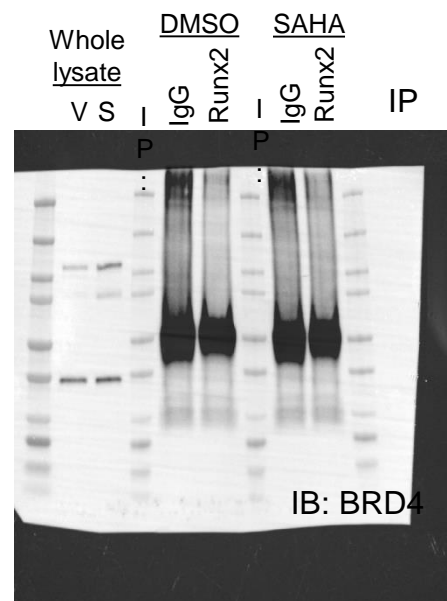

Supplement: NIHMS1690117-supplement-Figures___Supplemental.pdf [file NIHMS1690117-supplement-Figures___Supplemental.pdf]
